# Supplementary material
Source: MDPI journal article supplement (https://www.mdpi.com/search?q=animals-10-00128)
Supplement: s001 [file animals-10-00128-s001.pdf]

## Supplementary Material

**Table S1.** Interview schedules for puppy raisers and staff.

| Puppy raiser participants                                                                                                                                         | Staff participants                                                              |
|-------------------------------------------------------------------------------------------------------------------------------------------------------------------|---------------------------------------------------------------------------------|
| <i>General questions</i>                                                                                                                                          |                                                                                 |
| - How many puppies have you raised so far?                                                                                                                        | - N/A                                                                           |
| - Tell me what it's like to be a puppy raiser.                                                                                                                    |                                                                                 |
| - How would you compare your everyday life when raising your first puppy with your life before that?                                                              |                                                                                 |
| - How would you compare the practice of raising an assistance dog puppy with raising a pet puppy?                                                                 |                                                                                 |
| <i>Motivations and expectations</i>                                                                                                                               |                                                                                 |
| - What motivated you to become a puppy raiser in the first place?                                                                                                 | - What motivates people to become puppy raisers?                                |
| - What were your expectations when you commenced the program?                                                                                                     | - What is required of a raiser to raise a successful puppy?                     |
| - (If participants have raised more than one puppy), what motivated you to continue the practice of puppy raising?                                                | - Why do some raisers decide to raise another puppy, and others don't?          |
| - (If participants have raised more than one puppy) How would you compare your experience raising your first puppy with your experiences with subsequent puppies? |                                                                                 |
| <i>Insights</i>                                                                                                                                                   |                                                                                 |
| - What do you think contributes to raising a successful puppy?                                                                                                    | - What contributes to raising a successful assistance dog puppy?                |
| - What is required of you, and what are the ideal conditions for you to successfully raise an assistance dog puppy?                                               | - What are the ideal conditions to successfully raise an assistance dog puppy?  |
| <i>Challenges</i>                                                                                                                                                 |                                                                                 |
| - Tell me about any challenges that you encountered.                                                                                                              | - What kind of challenges do raisers commonly encounter?                        |
| - How did those difficulties affect your practice or the outcomes of your raising practice?                                                                       | - What do they do in those situations?                                          |
| - What could've been done differently to eliminate those impacts?                                                                                                 | - What do you or [your organisation] do in those situations?                    |
| <i>Puppy issues: health, behavioural issues</i>                                                                                                                   |                                                                                 |
| - Did you experience any health or behavioural issues when raising your first puppy?                                                                              | - What are the issues that first-time raisers commonly have with their puppies? |
| - Tell me what you felt when you encountered those issues                                                                                                         | - What do they usually do to respond to those situations?                       |
| - What was your approach when the issue first happened?                                                                                                           | - How about experienced raisers?                                                |
| - What did you do to search for a solution?                                                                                                                       |                                                                                 |
| - Would you handle the situation differently now that you have had more experience?                                                                               |                                                                                 |

**Table S1.** Interview schedules for puppy raisers and staff (Cont.)

| <b>Puppy raiser participants</b>                                                                                                                                                                                                                                                                                                                                                                                                    | <b>Staff participants</b>                                                                                                                                                                                                                                                                                                                                                                                           |
|-------------------------------------------------------------------------------------------------------------------------------------------------------------------------------------------------------------------------------------------------------------------------------------------------------------------------------------------------------------------------------------------------------------------------------------|---------------------------------------------------------------------------------------------------------------------------------------------------------------------------------------------------------------------------------------------------------------------------------------------------------------------------------------------------------------------------------------------------------------------|
| <i>Training and engagement</i>                                                                                                                                                                                                                                                                                                                                                                                                      |                                                                                                                                                                                                                                                                                                                                                                                                                     |
| <ul style="list-style-type: none"> <li>- Were you provided with clear instructions regarding your practice?</li> <li>- Were these instructions realistic and how effective were you able to carry them out?</li> <li>- How did your ability or inability to carry out the instructions affect your puppy outcomes?</li> <li>- Could the organisation have provided any resources to help you better follow instructions?</li> </ul> | <ul style="list-style-type: none"> <li>- In terms of following instructions, how would you compare raisers' practice with what you expect them to do?</li> <li>- To what extent does this affect the puppy outcomes?</li> <li>- How different is it between first-time raisers and experienced raisers?</li> <li>- What would make it more (or less) feasible for raisers to better follow instructions?</li> </ul> |
| <i>Knowledge</i>                                                                                                                                                                                                                                                                                                                                                                                                                    |                                                                                                                                                                                                                                                                                                                                                                                                                     |
| <ul style="list-style-type: none"> <li>- What do you know now that you wish you had known before you commenced your practice as a puppy raiser?</li> <li>- What advice would you give to someone who was considering raising an assistance dog puppy for the first time?</li> </ul>                                                                                                                                                 | <ul style="list-style-type: none"> <li>- How often do raisers reach out to you to seek information about raising their puppy?</li> <li>- How different is it between first-time raisers and experienced raisers?</li> <li>- What could be done differently to better equip first-time raisers?</li> </ul>                                                                                                           |
| <i>Organisational supports</i>                                                                                                                                                                                                                                                                                                                                                                                                      |                                                                                                                                                                                                                                                                                                                                                                                                                     |
| <ul style="list-style-type: none"> <li>- What supports did your organisation offer to assist you as a puppy raiser?</li> <li>- Could they have done anything more or different that would have improved your experience?</li> </ul>                                                                                                                                                                                                 | <ul style="list-style-type: none"> <li>- What kind of supports do puppy raisers commonly seek from you [or your organisation]?</li> <li>- What other types of supports would you like your organisation to offer, to better support the raisers?</li> </ul>                                                                                                                                                         |
| <i>Responsibility/workload</i>                                                                                                                                                                                                                                                                                                                                                                                                      |                                                                                                                                                                                                                                                                                                                                                                                                                     |
| <ul style="list-style-type: none"> <li>- How do you feel about the workload? How did the workload affect your practice, and how did you manage it?</li> </ul>                                                                                                                                                                                                                                                                       | <ul style="list-style-type: none"> <li>- How do raisers feel about the workload of raising a puppy?</li> <li>- What do you think about those perceptions?</li> </ul>                                                                                                                                                                                                                                                |
